# Supplementary material for: O‐glycan initiation directs distinct biological pathways and controls epithelial differentiation
Source: PubMed Central journal article supplement (PMC7271655; doi:10.15252/embr.201948885), 2020-04-23

## Table of Contents

|                                                                                               |   |
|-----------------------------------------------------------------------------------------------|---|
| Legends                                                                                       | 2 |
| Appendix Table S1. Indel analysis and sequencing of <i>GALNT</i> KO cell lines                | 3 |
| Appendix Figure S1. Overlap between different O-glycoproteomic approaches                     | 5 |
| Appendix Figure S2. Expression of <i>GALNT</i> genes (> 1 RPKM) in <i>GALNT</i> KO cell lines | 6 |

## Legends

**Appendix Table S1. Indel analysis and sequencing of *GALNT* KO cell lines.** Sequencing results for *GALNT* KO cell lines on WT or *COSMC* KO background. The table also contains information regarding the first predicted amino acid to be altered from indel formation. The clone suffixes A1-A3 refer to alleles 1-3, if heterozygotic indel formation is found.

**Appendix Figure S1. Overlap between different O-glycoproteomic approaches.** Venn diagrams depict overlap between proteins identified using the two O-glycoproteomic approaches for individual *GALNT* isoform KOs.

**Appendix Figure S2. Expression of *GALNT* genes (> 1 RPKM) in *GALNT* KO cell lines.** Bar graphs show average RPKM + SD.

**Appendix Table S1. Indel analysis and sequencing of *GALNT* KO cell lines.**

| Gene          | Clone                   | Sequence                                        | gRNA/ZFN                                                      | Exon     | Indel   | First a.a. |     |
|---------------|-------------------------|-------------------------------------------------|---------------------------------------------------------------|----------|---------|------------|-----|
| <i>GALNT1</i> | REF                     | TTCCTGGATGCCCATTTGTgagtgtACAGTGGGATGGCTGGAGCCTC | ZFN nuclease<br>CTGGATGCCCATTTGTgagtgtACAGT<br>GGGATGGCTG     | Total 11 |         | 559        |     |
|               | 12C9.A1                 | TTCCTGGATGCCCA-----CAGTGGGATGGCTGGAGCCTC        |                                                               | 4        | -11     | 211        |     |
|               | 12C9.A2                 | TTCCTGG-----                                    |                                                               | 4        | -129+12 | 208        |     |
|               | 3E4.A1                  | -----TGGAGCCTC                                  |                                                               | 4        | -108    | 185        |     |
|               | 3E4.A2                  | -----ATGGCTGGAGCCTC                             |                                                               | 4        | -104    | 184        |     |
|               | 12G9.A1                 | TTCCTGGATGCCCA-----CAGTGGGATGGCTGGAGCCTC        |                                                               | 4        | -11     | 211        |     |
|               | 12G9.A2                 | TTCCTGG-----                                    |                                                               | 4        | -129+12 | 208        |     |
|               | 10G6                    | TTCCTGGATGCCCATTTGT-ag-----                     |                                                               | 4        | -73     | 212        |     |
|               | (In <i>COSMC</i><br>KO) | 2E9.A1                                          | -----TGGGATGGCTGGAGCCTC                                       |          | 4       | -42        | 202 |
|               | 2E9.A2                  | TTCCTGGATGCCCA-----                             |                                                               | 4        | -41     | 211        |     |
| <i>GALNT2</i> | REF                     | GGTCGGCCCTACTCAGGACcgg--tggtCAGGTGAGGCCAGGAGATG | ZFN nuclease<br>GTCGGCCCTACTCAGGACcgtggtCA<br>GGTGGGCCAGGAGAT | Total 16 |         | 571        |     |
|               | 2A2                     | GGTCGGCCCT-ACTCAGGA-----GATG                    |                                                               | 4        | -22     | 155        |     |
|               | 2D3.A1                  | GGTCGGCCCTACTCAGGACcgg-tggtCAGGTGAGGCCAGGAGATG  |                                                               | 4        | +1      | 156        |     |
|               | 2D3.A2                  | GTCGG-----                                      |                                                               | 4        | -53     | 151        |     |
|               | 2D6.A1                  | GG-----AGATG                                    |                                                               | 4        | -37     | 149        |     |
|               | 2D6.A2                  | GGTCGGCC-T-----                                 |                                                               | 4        | -43     | 152        |     |
|               | 10G5.A1                 | GGTCGGCCCTCACTCAG-----GTGAGGCCAGGAGATG          |                                                               | 4        | -10     | 154        |     |
|               | 10G5.A2                 | GGTCGGCCCT-ACTCT-----GGCCAGGAGATG               |                                                               | 4        | -16     | 152        |     |

|               |        |                                                |  |   |      |     |
|---------------|--------|------------------------------------------------|--|---|------|-----|
| (In COSMC KO) | 1G8.A1 | GGTCGGCCCT-CTCAGGACcgTAtggtCAGGTGAGGCCAGGAGATG |  | 4 | +2   | 157 |
|               | 1G8.A2 | -----cg--tggtCAGGTGAGGCCAGGAGATG               |  | 4 | -117 | 125 |

|               |         |                                                 |                                                          |          |      |           |
|---------------|---------|-------------------------------------------------|----------------------------------------------------------|----------|------|-----------|
| <i>GALNT3</i> | REF     | TTTGAATTCAACAAACCTTCTcct-----                   | ZFN nuclease<br>TTCAACAAACCTTCTccttatGGAAG<br>TAACCATAAC | Total 11 |      | 633       |
|               | 4.6B    | TTTGAATTCAACAAACCTTCTcctCCGGACCCTAATTGACTGAGCG  |                                                          | 5        | +22  | 322       |
|               | REF     | TTTGAATTCAACAAACCTTCTccttatGGAAGTAACCATAAC      |                                                          |          |      |           |
|               | 6.7E    | T-----atGGAAGTAACCATAAC                         |                                                          | 5        | -24  | 314       |
|               | 5.6D.A1 | TTTGAATTCAACAAACCTTCTc-----ATAAC                |                                                          | 5        | -15  | 321       |
|               | 5.6D.A2 | TTTGAATTCAACAAACCTTCTcctta-----ACCATAAC         |                                                          | 5        | -8   | 322(stop) |
|               | 5.6D.A3 | TTTGAATTCAACAAACC-----                          |                                                          | 5        | -26  | 320       |
|               | 9.8B.A1 | TT-----GTAACCATAAC                              |                                                          | 5        | -29  | 314       |
|               | 9.8B.A2 | TTTGAATTCAACAAACCTTCT-----                      |                                                          | 5        | -33  | 321       |
|               | REF     | TTTGAATTCAACAAACCTTCTcctt-atGGAAGTAACCATAA      |                                                          |          |      |           |
|               | 2.9B    | TTTGAATTCAACAAACCTTCTccttAatGGAAGTAACCATAA      |                                                          | 5        | +1   | 322(stop) |
| gRNA          | REF     | GAAAAGGTCTGATCACTGCTCGGTTGCTAG                  | gRNA1<br>CTGATCACTGCTCGGTTGCT                            |          |      |           |
|               | 2.4D.A1 | GAAAAGGTCTGATCACTGC-----TGCTAG                  |                                                          | 4        | -5   | 261       |
|               | 2.4D.A2 | GAAAAGGTCTGATCACTGCTCGGTT (+131) GCTAG          |                                                          | 4        | +131 | 263       |
|               | 2.4D.A3 | GAAAAGGTCTGATCACTGCTCGGTG (+206) GCTAG          |                                                          | 4        | +206 | 262       |
|               | REF     | TAGTTTTTCATAATGAA-GCGTGGT                       | gRNA2<br>TAGTTTTTCATAATGAAGCG                            |          |      |           |
|               | 2.2H    | TAGTTTTTCATAATGAAAGCGTG                         |                                                          | 3        | +1   | 197       |
|               | REF     | CTGTCCACAGTGTGCTCTATTCTTCACCTGCAATACTG--CTGAAGG | gRNA3<br>TTCACCTGCAATACTGCTGA                            |          |      |           |
|               | 11H.A1  | CTGTCCACAGTGTGCTCTATTCTTCACCTGCA-----GTCTGAAGG  |                                                          | 3        | +2-6 | 215       |
|               | 11H.A2  | CT-----                                         |                                                          | 3        | -84  | 205       |
| (In COSMC KO) | REF     | TTTGAATTCAACAAACCTTCTcct-----                   | ZFN nuclease<br>TTCAACAAACCTTCTccttatGGAAG<br>TAACCATAAC |          |      |           |
|               | 3.3B    | TTTGAATTCAACAAACCTTCTcctCCGGATCCTAATTGACTGAGCG  |                                                          | 5        | +22  | 322       |

# Appendix Figure S1

## Protein identifications

WT  $\Delta$ T1 TMT Jacalin  
(12.5 % overlap)

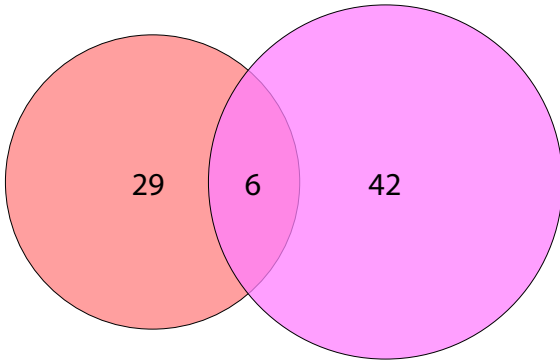

WT  $\Delta$ T2 TMT Jacalin  
(30.77 % overlap)

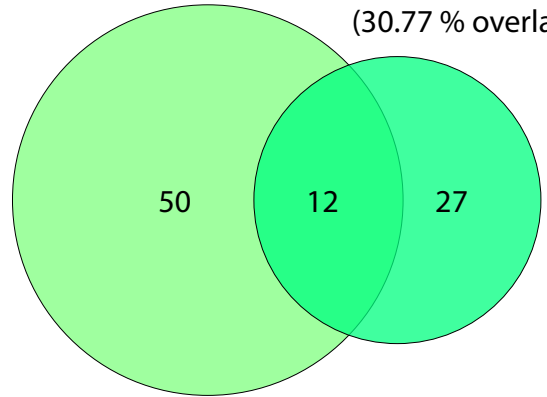

$\Delta$ COSMC  $\Delta$ T1 dimethyl VVA  
(17.14 % overlap)

$\Delta$ COSMC  $\Delta$ T2 dimethyl VVA  
(19.4 % overlap)

WT  $\Delta$ T3 TMT Jacalin  
(31.7 % overlap)

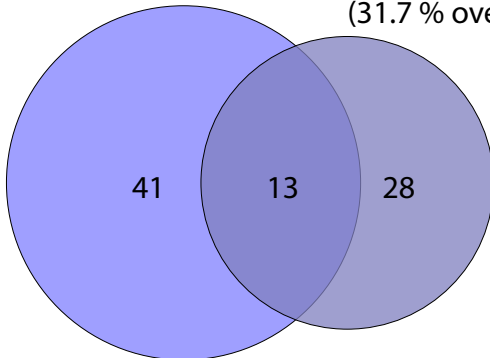

$\Delta$ COSMC  $\Delta$ T3 dimethyl VVA  
(24.1 % overlap)

Appendix Figure S2

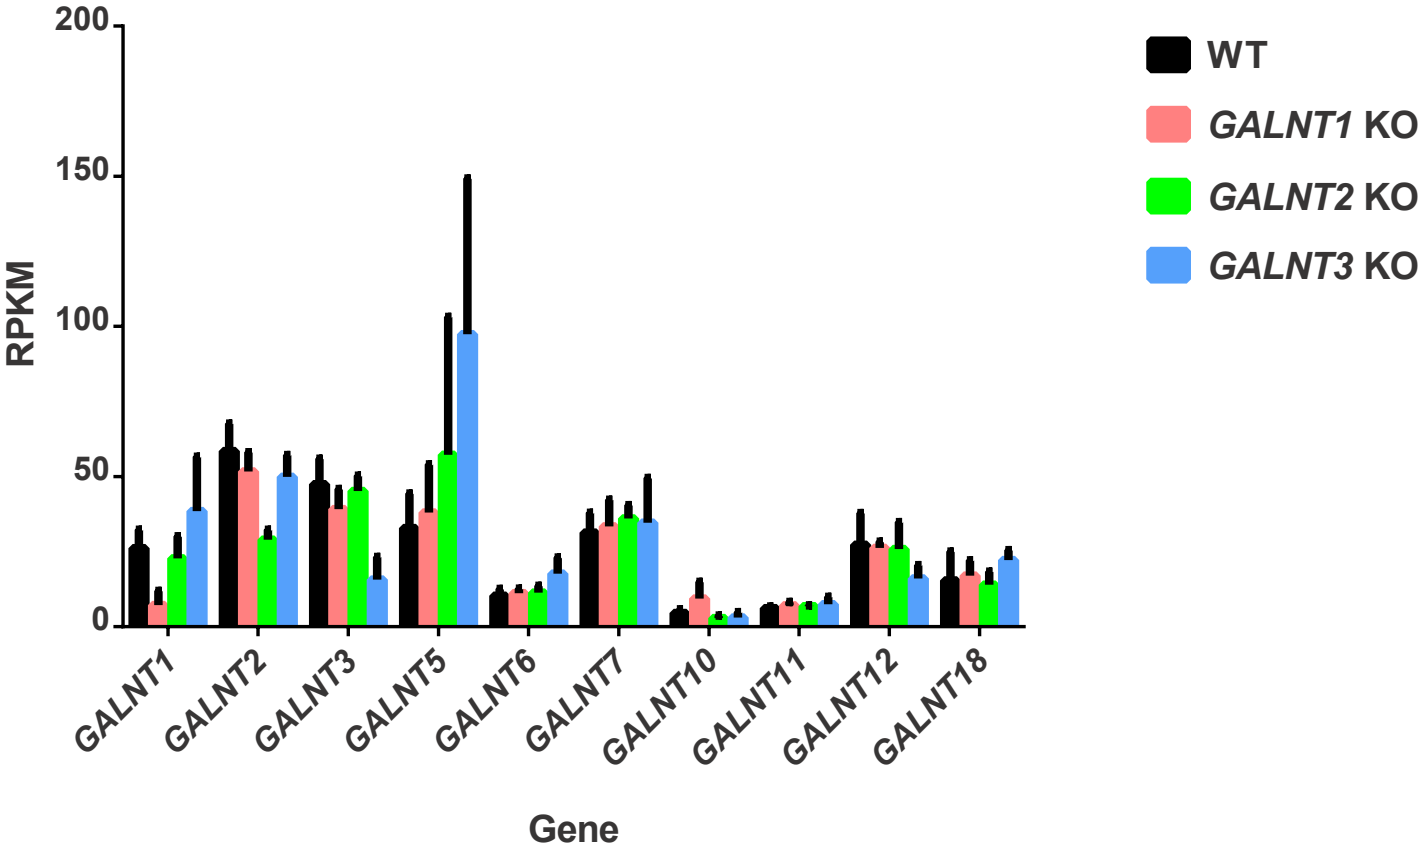

Supplement: EMBR-21-e48885-s001.pdf [file EMBR-21-e48885-s001.pdf]
